1  
2  
3  
4  
5  
6  
7  
8  
9  
10  
11  
12  
13  
14  
15  
16  
17  
18  
19  
20  
21  
22  
23  
24  
25  
26  
27  
28

**TITLE PAGE**

**The trends in the uninsured rates among non-elderly adult patients hospitalized with acute pancreatitis in the US during 2004-2019.**

Kumar, Vivek MD 1; Barkoudah, Ebrahim MD MPH 1; Jin, David X MD MPH 2; Banks, Peter 2 MD; McNabb-Baltar, Julia MD MPH 2\*.

1Department of General Internal Medicine, Brigham and Women’s Hospital, Boston, Massachusetts, USA

2Division of Gastroenterology, Hepatology, and Endoscopy, Center for Pancreatic Disease Brigham and Women’s Hospital, Boston, Massachusetts, USA

**\*Corresponding Author**

Correspondence

Dr. Julia McNabb-Baltar MD MPH

Division of Gastroenterology, Hepatology, and Endoscopy, Center for Pancreatic Disease, Brigham and Women’s Hospital, 75 Francis Street, Boston, Massachusetts, USA 02115

Assistant Professor Harvard Medical School, Boston, Massachusetts, USA.

Email: [Jmcnabb-baltar@bwh.harvard.edu](mailto:Jmcnabb-baltar@bwh.harvard.edu)

29 **Disclosures:**

30

31 **Guarantor of the article:** Kumar, Vivek & McNabb-Baltar, Julia

32

33

34 **Specific author contributions:**

35 Kumar, Vivek: Study concept and design; acquisition of data; analysis and interpretation of data;  
36 drafting of the manuscript

37 Barkoudah, Ebrahim: Interpretation of data, Critical revision of the manuscript for important  
38 intellectual content

39 Jin, David X: Critical revision of the manuscript for important intellectual content

40 Banks, Peter: Critical revision of the manuscript for important intellectual content

41 McNabb-Baltar, Julia: Study concept and design; drafting of the manuscript; critical revision of  
42 the manuscript for important intellectual content; study supervision

43

44 **Financial support: None**

45 **Potential competing interests**

46 Kumar, Vivek: None

47 Barkoudah, Ebrahim: Dr. Barkoudah reports research support payments from National Institutes  
48 of Health/National Heart, Lung, and Blood Institute, Bristol Myers Squibb and Janssen,  
49 payments made to Brigham and Women's Hospital for performing clinical endpoints sponsored  
50 by various entities and Advisory Board fees from Bristol Myers Squibb, Janssen, Novartis, Pfizer  
51 and Portola, and travel expenses from Alexion.

52 Jin, David X: None

53 Banks, Peter: None

54 McNabb-Baltar, Julia: None

55

56

57 **Abstract**

58

59

60 **Background and Aim:**

61 The impact of health reforms such as affordability care act (ACA) and Medicaid extension  
62 program on health insurance coverage among acute pancreatitis (AP) patients in the United  
63 States (US) is unknown. We report the trends and forecasts for the uninsured rates among acute  
64 pancreatitis (AP) patients in the US.

65

66 **Methods:** We included non-elderly adult patients (aged 18 -64 years), hospitalized with AP in  
67 the nationwide inpatient sample database years 2004- 2019. We calculated the percentage of  
68 uninsured and Medicaid patients for each year and applied joinpoint (JP) regression model to  
69 study the trends.

70

71 **Results** The uninsured rates among patients hospitalized with AP were almost twice compared to  
72 the national average rates for all hospitalized patients. Uninsured rates were higher among  
73 Hispanic and African American races, rural location, lower income quartiles and in the southern  
74 US regions. A statistically significant decline was observed during 2013-2016 with an APC of -  
75 12.23 ( -20- -4);  $p<0.01$ ). The decline was apparent among all racial groups, locations and  
76 income groups but not in the southern region where gap in the uninsured rates worsened  
77 compared to other geographical regions. The trends reversed more recently, and the uninsured  
78 rates surged in 2018 for the first time after 2010. In 2019, 12.5% AP patients were uninsured  
79 compared to 11.6% in 2017.

80

81 **Conclusions:** The ACA and Medicaid extension programs had a positive impact on the health

82 insurance coverage among patients hospitalized with AP including racial minorities and low-  
83 income groups. However, the positive impact of ACA on the uninsured rates has decreased in  
84 most recent years (2017-2019) and may disappear completely in the coming years.

85

86

87

88

89

90

91

92

93

94

95

96

97

98

99

100

101

102

103

104

105 Acute pancreatitis (AP) is one of the leading gastrointestinal causes of hospitalizations in the  
106 United States (US) with its incidence increasing<sup>1</sup>. In the year 2015, AP led to more than one million  
107 hospitalization days in the US, resulting in more than \$2.5 billion in hospitalization charges<sup>2</sup>. A  
108 previous study has reported a higher incidence of uninsured patients in the year 2009-2012  
109 compared to 2002-2005<sup>1</sup>. So far, no study has reported the trends in the rates of uninsured patients  
110 among AP patients. The lack of insurance has been associated with poor access to healthcare and  
111 subsequent adverse outcomes<sup>3</sup>. In the US, the number of uninsured patients decreased after health  
112 reforms such as the Affordability Care Act (ACA) and Medicaid extension programs<sup>4</sup>. However,  
113 the impact of ACA among patients with AP is still unknown. The non-elderly (aged 18-64 years  
114 old) AP patients in the US are unique due to higher rates of alcohol and substance use, lower  
115 income groups, and a higher fraction of minority races; all these factors are also associated with a  
116 lack of health insurance in the US<sup>5</sup>. In this study, we aim to analyze the trends in the uninsured  
117 rates among patients hospitalized with a principal diagnosis of AP in the last 15 years, emphasizing  
118 the most recent trend changes. We examined the disparities in the health coverage among AP  
119 patients by geographical regions, race, rural/urban status, and income levels. We also project the  
120 uninsured rates among these patients for the next 4 years after adjusting for unemployment rates.  
121 For this study, we included non-elderly adult patients, hospitalized with AP using discharge data  
122 from the National Inpatient Sample and the Nationwide Inpatient Sample (NIS), Healthcare Cost  
123 and Utilization Project (HCUP), Agency for Healthcare Research and Quality for the years 2004-  
124 2019<sup>12</sup>. We collected data on uninsured and Medicaid patients, race, rural/urban residence, income,  
125 and geographical regions for each year. We calculated the percentage of uninsured and Medicaid  
126 patients for an individual year and applied Joinpoint (JP) regression model to study the trends<sup>6</sup>.  
127 This program enables us to test whether an apparent change in the trend is statistically significant

128 by using Monte Carlo Permutation method as the test of significance. The location of JP was not  
129 known prior and was estimated by the program. Annual percent change (APC) and average annual  
130 percent change (AAPC) were calculated with *p* values to test if apparent changes in the trends  
131 were statistically significant. For forecasting, we applied vector autoregression (VAR) model, a  
132 multivariate time series model, and adjusted uninsured rates with the unemployment rates in the  
133 US. The unemployment rates were obtained from the US Bureau of Labor Statistics of the US  
134 department of labor <sup>7</sup>. Statistical analysis was conducted using National Cancer Institute's  
135 Joinpoint regression software and 'R'.

136 The uninsured rates among patients hospitalized with AP were almost twice the national average  
137 rates for all hospitalized patients (Fig 1a). Uninsured rates were higher among Hispanic and  
138 African American races, rural locations, lower-income quartiles, and southern US regions (Fig 2a  
139 & 2b ). The trends in the uninsured rates among AP patients mirrored the changes in the national  
140 rates, but the gap persisted (Fig 1a). Overall, the change in the uninsured rate from 2004 to 2019  
141 was not statistically significant with an AAPC of -1 (-5.8-4.1); *p*=0.7). But a statistically  
142 significant decline was observed during 2013-2016 with an APC of -12.23 ( -20- -4); *p*<0.01). A  
143 simultaneous increase in Medicaid coverage was also noticed (fig 1b). The decline was apparent  
144 among all racial groups, locations, income groups and geographical regions, however uninsured  
145 rates in the southern region remained considerably higher (Fig 2a). Unfortunately, trends reversed  
146 more recently, and the uninsured rates surged in 2017 for the first time after 2010. In 2019, 12.5%  
147 AP patients were uninsured compared to 11.7% in 2017. After adjusting for unemployment rates,  
148 the uninsured rates are anticipated to increase drastically in the year 2020 to 16.04% (12.8-19.3),  
149 followed by some decline in the following years 13.9(10.7-17.13) in 2021, 13.97 (10.7-17.2) in  
150 2022 and 13.5(10.3-16.8) in 2023.

151 The higher uninsured rates among AP patients are due to these patients' unique characteristics, as  
152 mentioned previously. On Joinpoint regression, we noted several periods with changes in the  
153 uninsured rates. The most prominent was a decline in the years 2013-2016. In the US, a major  
154 factor affecting the lack of insurance among the non-elderly population is unemployment<sup>8</sup>. While  
155 the pattern in the uninsured rates during the initial years of the study was parallel to the  
156 unemployment rates, the decline during the years 2013-2016 was out of proportion to what could  
157 be explained by declining unemployment rates alone. In fact, this corresponded to the rollout of  
158 ACA and Medicaid expansion in the US. By 2016, 33 out of 50 states had implemented  
159 Medicaid expansion. The Medicaid expansion was lower in the southern region, where only 7  
160 out of 16 states had implemented Medicaid expansion by the year 2016<sup>9</sup>. This observation also  
161 explains the absence of a sharp decline among uninsured patients in the southern region, unlike  
162 other regions in the US. The higher rates of uninsured among Hispanics and African American is  
163 due to higher rates of unemployment and poverty, which is consistent with the overall rates of  
164 uninsured in the USA<sup>10</sup>.

165 Unfortunately, we noted a rising trend in the uninsured in the years 2017-2019. This trend was  
166 despite the declining rates of unemployment in the US during this time and is most likely the  
167 result of several changes made in the year 2017 to roll back ACA. These changes included  
168 waiving or delaying the features of ACA that imposed financial or regulatory burden, reduction  
169 in the funding for ACA outreach and education program. Besides, there was also discontinuation  
170 of cost-sharing reduction to insurers which led to the loss of incentives to purchase the coverage  
171 and increased the uncertainty among the eligible individuals resulting in loss of health insurance  
172 coverage<sup>11</sup>.

173 To forecast the uninsured rates for the next three years, we adjusted for the unemployment rates.  
174 Due to the pandemic, the unemployment rates increased drastically in the US in 2020 to 6.7,  
175 almost double of 3.6 in 2019. As unemployment is a major driving factor for insurance among  
176 the non-elderly population in the US, we anticipated a drastic rise in the uninsured rates, which  
177 was found to be true. The projected rates are similar to the rates prior to implementing ACA  
178 reforms which implies that we will probably lose most of the gains in terms of health coverage  
179 that were achieved due to ACA if there are no significant changes in the policy.

180 The limitations of this study include the use of an administrative database using ICD-9 and ICD-  
181 10 codes which is subject to misclassification bias. Besides unemployment other factors such as  
182 patient preference may also affect the uninsured rates, which could not be analyzed due to the  
183 limitations of the database. Nevertheless, we conclude that the ACA and Medicaid extension  
184 programs positively impacted the health insurance coverage among patients hospitalized with  
185 AP, specifically on racial minorities and low-income groups. The impact was less apparent in the  
186 southern US, where many states did not implement these reforms. Despite the strong US  
187 economy and declining unemployment rates during 2017-2019, there was a surge in uninsured  
188 patients, likely due to the changes made in the Medicaid policies. This surge is projected to  
189 continue for the next few years. Therefore, new policies and reforms are warranted for the  
190 communities at the highest risk of losing coverage-ethnic minorities and lower-income groups.

191  
192  
193  
194  
195

196

197



198 **References**

199

- 200 1. Krishna SG, Kamboj AK, Hart PA, Hinton A, Conwell DL. The changing epidemiology of  
201 acute pancreatitis hospitalizations: a decade of trends and the impact of chronic pancreatitis.  
202 *Pancreas*. 2017;46(4):482.
- 203 2. Peery AF, Crockett SD, Murphy CC, et al. Burden and cost of gastrointestinal, liver, and  
204 pancreatic diseases in the United States: update 2018. *Gastroenterology*. 2019;156(1):254-272.  
205 e11.
- 206 3. Michael McWilliams J. Health consequences of uninsurance among adults in the United  
207 States: recent evidence and implications. *The Milbank Quarterly*. 2009;87(2):443-494.
- 208 4. Guth M, Garfield R, Rudowitz R. The effects of Medicaid expansion under the ACA: Studies  
209 from January 2014 to January 2020. *Kaiser Family Foundation*. 2020;
- 210 5. Substance Abuse and Mental Health Services Administration CfBHSaQF, (2014). The TEDS  
211 Report: Health Insurance Status of Adult Substance Abuse Treatment Admissions Aged 26 or  
212 Older: 2011. Rockville, MD. [https://www.samhsa.gov/data/sites/default/files/sr134-health-](https://www.samhsa.gov/data/sites/default/files/sr134-health-insurance-2014/sr134-health-insurance-2014/sr134-health-insurance-2014.htm)  
213 [insurance-2014/sr134-health-insurance-2014/sr134-health-insurance-2014.htm](https://www.samhsa.gov/data/sites/default/files/sr134-health-insurance-2014/sr134-health-insurance-2014.htm)
- 214 6. Joinpoint Regression Program, Version 4.9.0.1 - February 2022; Statistical Methodology  
215 and Applications Branch, Surveillance Research Program, National Cancer Institute.  
216 <https://surveillance.cancer.gov/joinpoint/>
- 217 7. US BUREAU OF LABOR STATISTICS <https://data.bls.gov/timeseries/LNS14000000>
- 218 8. Broaddus M. *Research note: Medicaid enrollment decline among adults and children too*  
219 *large to be explained by falling unemployment*. Center on Budget and Policy Priorities.; 2019.
- 220 9. Courtemanche C, Fazlul I, Marton J, Ukert B, Yelowitz A, Zapata D. The Affordable Care  
221 Act's Coverage Impacts in the Trump Era. *INQUIRY: The Journal of Health Care Organization,*  
222 *Provision, and Financing*. 2021;58:00469580211042973.
- 223 10. Gonzales S, Sommers BD. Intra-ethnic coverage disparities among Latinos and the effects  
224 of health reform. *Health services research*. 2018;53(3):1373-1386.
- 225 11. Keith K. Uninsured rate rose in 2018, says Census Bureau report. *Health Aff*. 2019;
- 226 12. HCUP National Inpatient Sample (NIS). Healthcare Cost and Utilization Project (HCUP). 2004-  
227 2019. Agency for Healthcare Research and Quality, Rockville, MD. [www.hcup-](http://www.hcup-us.ahrq.gov/nisoverview.jsp)  
228 [us.ahrq.gov/nisoverview.jsp](http://www.hcup-us.ahrq.gov/nisoverview.jsp)

229

230

231

232

233

234

235 **Fig 1. Trends in the rates of uninsured patients hospitalized with acute pancreatitis**  
 236 **1a. Overall, among all hospitalized patients vs AP patients. 1b. Uninsured and Medicaid**  
 237 **insurance among patients with acute pancreatitis**  
 238

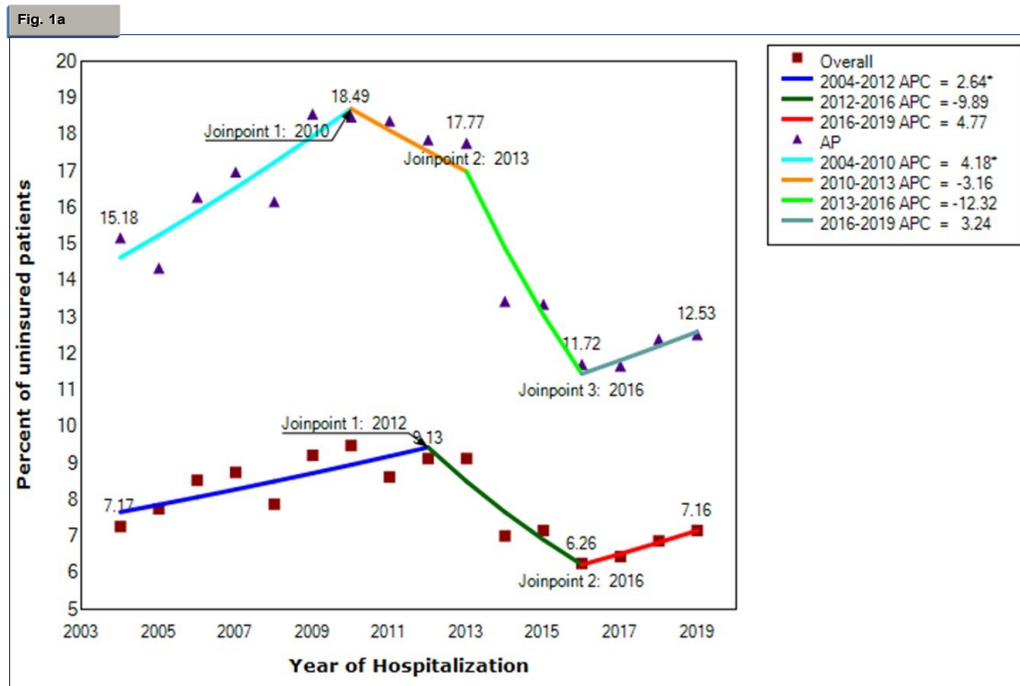

239  
 240  
 241

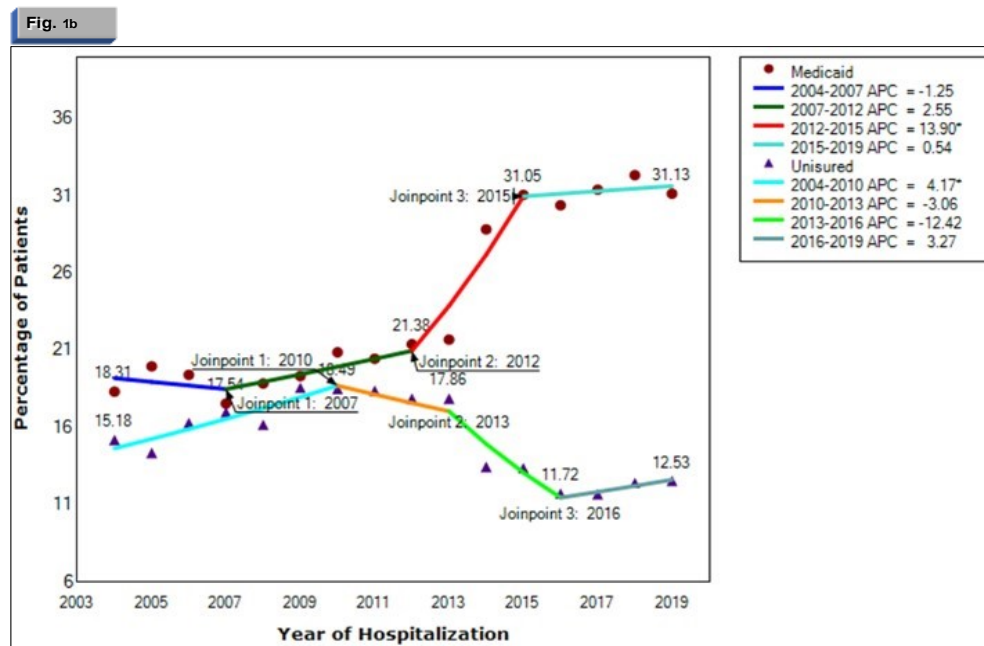

242  
 243

244 **Fig 2. Trends in the rates of uninsured patients hospitalized with acute pancreatitis**  
245 **2a. geographical regions and income groups 2b. stratified by race, and rural-urban**  
246 **location.**

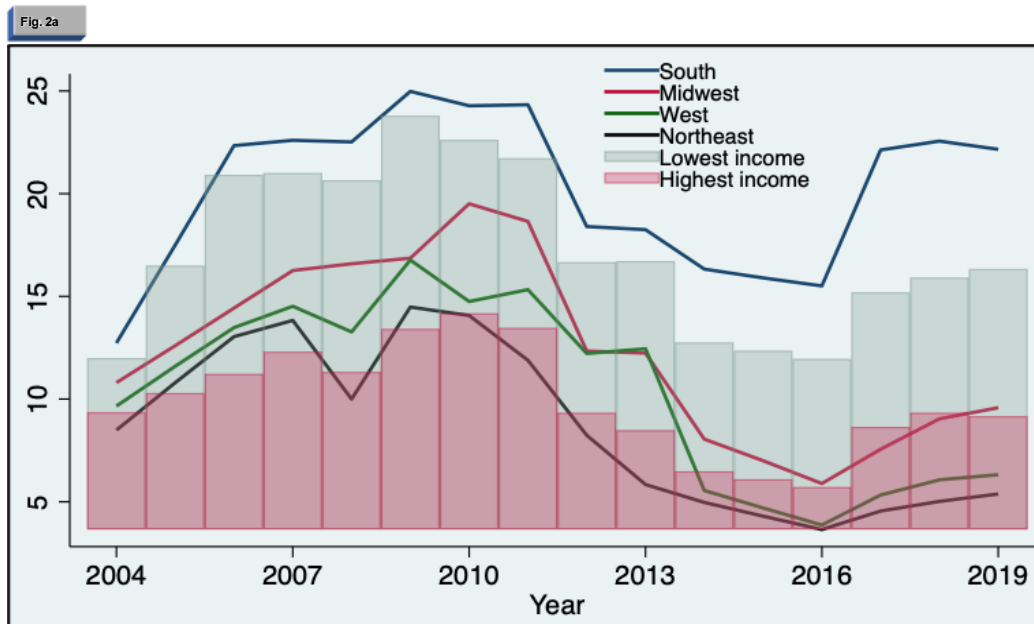

247

248

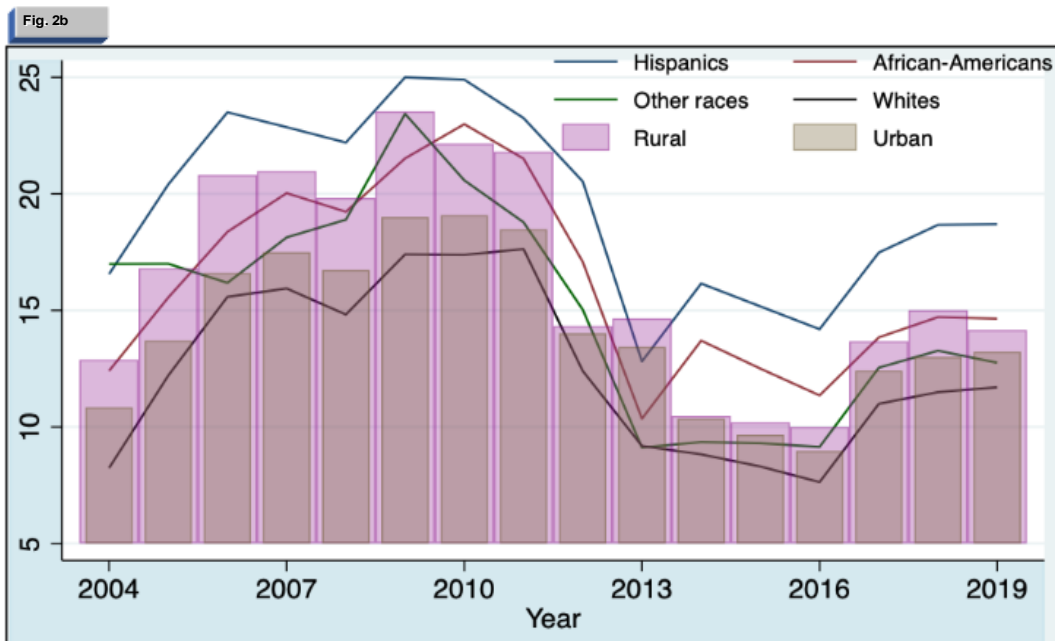

249
